# EGFR Gene Variants Are Associated with Specific Somatic Aberrations in Glioma

Carl Wibom<sup>1\*</sup>, Soma Ghasimi<sup>2</sup>, Peter Van Loo<sup>3,10</sup>, Thomas Brännström<sup>4</sup>, Johan Trygg<sup>5</sup>, Ching Lau<sup>6</sup>, Roger Henriksson<sup>7</sup>, Tommy Bergenheim<sup>8</sup>, Ulrika Andersson<sup>2</sup>, Patrik Rydén<sup>9</sup>, Beatrice Melin<sup>2</sup>

**1** Department of Radiation Sciences, Oncology, Computational Life Science Cluster (CLiC), Umeå University, Umeå, Sweden, **2** Department of Radiation Sciences, Oncology, Umeå University, Umeå, Sweden, **3** Cancer Genome Project, Wellcome Trust Sanger Institute, Hinxton Cambridge, United Kingdom, **4** Department of Medical Biosciences, Pathology, Umeå University, Umeå, Sweden, **5** Department of Chemistry, Computational Life Science Cluster (CLiC), Umeå University, Umeå, Sweden, **6** Department of Pediatrics and Hematology, Baylor College of Medicine, Houston, Texas, United States of America, **7** Department of Oncology, Karolinska Institute, Stockholm, Umeå, Sweden, **8** Pharmacology and Clinical Neuroscience, Umeå University, Umeå, Sweden, **9** Computational Life Science Cluster (CLiC), Department of Mathematics and Mathematical Statistics, Umeå University, Umeå, Sweden, **10** Department of Human Genetics, VIB and KU Leuven, Leuven, Belgium

## Abstract

A number of gene variants have been associated with an increased risk of developing glioma. We hypothesized that the reported risk variants may be associated with tumor genomic instability. To explore potential correlations between germline risk variants and somatic genetic events, we analyzed matched tumor and blood samples from 95 glioma patients by means of SNP genotyping. The generated genotype data was used to calculate genome-wide allele-specific copy number profiles of the tumor samples. We compared the copy number profiles across samples and found two EGFR gene variants (rs17172430 and rs11979158) that were associated with homozygous deletion at the CDKN2A/B locus. One of the EGFR variants (rs17172430) was also associated with loss of heterozygosity at the EGFR locus. Our findings were confirmed in a separate dataset consisting of matched blood and tumor samples from 300 glioblastoma patients, compiled from publically available TCGA data. These results imply there is a functional effect of germline EGFR variants on tumor progression.

**Citation:** Wibom C, Ghasimi S, Van Loo P, Brännström T, Trygg J, et al. (2012) EGFR Gene Variants Are Associated with Specific Somatic Aberrations in Glioma. PLoS ONE 7(12): e47929. doi:10.1371/journal.pone.0047929

**Editor:** Russell O. Pieper, University of California-San Francisco, United States of America

**Received:** June 29, 2012; **Accepted:** September 18, 2012; **Published:** December 7, 2012

**Copyright:** © 2012 Wibom et al. This is an open-access article distributed under the terms of the Creative Commons Attribution License, which permits unrestricted use, distribution, and reproduction in any medium, provided the original author and source are credited.

**Funding:** The study was supported by the following grants; Umeå University Hospital Cutting Edge Grant, Young Investigator Award by Umeå University, Acta Oncologica through the Royal Swedish Academy of Science, The Swedish Cancer Foundation, The Swedish Research Council, and the Northern Sweden Research Foundation. PVL is a postdoctoral researcher of the Research Foundation - Flanders (FWO) and is as a visiting scientist at the Wellcome Trust Sanger Institute supported by a travel grant from the FWO. The SNP&SEQ Technology Platform is part of Science for Life Laboratory at Uppsala University and supported as a national infrastructure by the Swedish Research Council. The funders had no role in study design, data collection and analysis, decision to publish, or preparation of the manuscript.

**Competing Interests:** The authors have declared that no competing interests exist.

\* E-mail: carl.wibom@onkologi.umu.se

## Introduction

Genome-wide association studies (GWAS) have identified common genetic variants that are likely to be involved in the etiology of glioma. There are three published GWAS to date that have identified eight different loci associated with glioma risk [1,2,3], including variants annotating key genes in glioma progression, such as the epidermal growth factor receptor (EGFR), and the tumor suppressor gene CDKN2A (alias p14, p16, and ARF). In addition to the GWAS, two separate candidate gene studies have been performed [4,5], resulting in a number of putative risk variants associated with glioma susceptibility.

The Cancer Genome Atlas (TCGA) has published a comprehensive genomic analysis of 206 glioblastoma cases [6]. This work highlights three pathways, including 20 genes, of particular interest in glioma tumorigenesis. Four out of eight of the risk variants reported in the GWAS studies map to genes listed by the TCGA report. Each locus that the GWAS risk variants map to, and their involvement in glioblastoma tumorigenesis, is summarized in a review by Melin [7].

Many of the loci harboring the risk variants (Table 1) can be directly or indirectly linked to genomic stability. First, most

obvious are the two genes involved in regulation of telomeres (RTEL1 and TERT). RTEL1 is directly involved in maintenance of genome stability, through suppression of homologous recombination [8], and TERT expression is shown to correlate with enhanced genome stability and DNA repair [9]. Second, the CDKN2A/CDKN2B gene products are involved in RB-signaling, and as such they are ultimately involved in regulation of genomic stability through cell cycle control. Third, EGFR acts as an early activator of transcription in the RAS signaling pathway, where dysfunctional RAS regulation is implicated in destabilization of the karyotype, especially in the absence of p53 [10]. Lastly, ERBB2 is included in the same growth factor receptor family as EGFR and interacts physically with EGFR by dimerization [11]. The functions of PHDLB1 and CCDC26 are less well characterized. Variations within these genes are associated especially with low grade glioma [12,13].

We hypothesized that reported risk variants are associated with genomic instability. To test this hypothesis, we analyzed matched blood and tumor samples from 95 glioma patients by means of SNP genotyping. Based on the SNP genotyping data, we calculated genome-wide allele-specific copy number in the tumor

**Table 1.** Risk gene variants.

| Discovery (UMU) |     |           |               |              |             |       |            |           |                      | Validation (TCGA) |             |    |           |            |                      |              |             |     |             |     |
|-----------------|-----|-----------|---------------|--------------|-------------|-------|------------|-----------|----------------------|-------------------|-------------|----|-----------|------------|----------------------|--------------|-------------|-----|-------------|-----|
| Risk variant    | Chr | Position  | Gene          | Major allele | Risk allele | Ref.  | Surrogate  | Position  | LD (r <sup>2</sup> ) | Major allele      | Risk allele | n  | Surrogate | Position   | LD (r <sup>2</sup> ) | Major allele | Risk allele | n   | n (rare+hz) |     |
| rs2736100       | 5   | 1339516   | TERT          | A            | C           | [2]   |            |           |                      |                   |             | 24 |           |            |                      |              |             | 46  | 239         |     |
| rs2252586       | 7   | 54946418  | EGFR          | G            | A           | [1]   | rs6945082  | 54925952  | 0.883                | G                 | A           | 38 |           |            |                      |              |             | 116 | 169         |     |
| rs6969537       | 7   | 55049912  | EGFR          | G            | G           | [5]   |            |           |                      |                   |             | 55 |           |            |                      |              |             | 222 | 63          |     |
| rs17172430      | 7   | 55090144  | EGFR          | G            | G           | [4]   | rs1015793  | 55081810  | 0.742                | A                 | A           | 60 |           |            |                      |              |             | 236 | 49          |     |
| rs11979158      | 7   | 55126843  | EGFR          | A            | A           | [1]   | rs10245472 | 55114972  | 1.000                | G                 | G           | 57 |           |            |                      |              |             | 209 | 76          |     |
| rs4947979       | 7   | 55163119  | EGFR          | A            | A           | [4]   |            |           |                      |                   |             | 44 |           |            |                      |              |             | 184 | 101         |     |
| rs4295627       | 8   | 130754639 | CCDC26        | A            | C           | [2]   | rs6470745  | 130711103 | 1.000                | A                 | G           | 43 |           |            |                      |              |             | 198 | 87          |     |
| rs1412829       | 9   | 22033926  | CDKN2B        | A            | G           | [3]   | rs634537   | 22022152  | 1.000                | A                 | C           | 17 |           |            |                      |              |             | 89  | 196         |     |
| rs4977756       | 9   | 22058652  | CDKN2A-CDKN2B | A            | G           | [2]   |            |           |                      |                   |             | 18 |           |            |                      |              |             | 92  | 193         |     |
| rs498872        | 11  | 117982577 | PHLDB1        | G            | A           | [2]   |            |           |                      |                   |             | 31 |           |            |                      |              |             | 131 | 154         |     |
| rs1476278       | 17  | 35089769  | ERBB2         | A            | G           | [4]   | rs903502   | 35083130  | 1.000                | A                 | G           | 33 |           | rs12150298 | 35088067             | 1.000        | G           | A   | 122         | 163 |
| rs2952155       | 17  | 35115244  | ERBB2         | G            | A           | [4]   | rs9635726  | 35273667  | 0.678                | G                 | A           | 44 |           | rs9635726  | 35273667             | 0.678        | G           | A   | 186         | 99  |
| rs6010620       | 20  | 61780283  | RTEL1         | G            | G           | [2,3] |            |           |                      |                   |             | 52 |           |            |                      |              |             | 201 | 84          |     |

LD(r<sup>2</sup>) HapMap linkage disequilibrium (r<sup>2</sup>) data between used surrogate marker and original risk variant, n number, major samples homozygous for the major allele, rare+hz samples homozygous for the rare allele plus heterozygous samples.

doi:10.1371/journal.pone.0047929.t001

samples. This enabled us to explore possible correlations between germline risk genotypes and frequencies of somatic aberrations.

## Materials and Methods

### Patients and Ethics Statement

This study was based on samples collected from glioma patients diagnosed at Umeå University Hospital, between 1995 and 2008. A total of 197 patients were diagnosed during this period. Ninety-five (95) patients from whom matched blood and tumor samples were available were included in the study. Diagnoses were confirmed by pathology review. This sample set is referred to as the UMU set, and its characteristics are listed in Table 2.

Collection of blood samples, brain tumor tissues and clinico-pathological information from patients was undertaken with written informed consent and the study was approved by our ethical board, in accordance with the Umeå University Hospital guidelines.

### DNA extraction and Genotyping

DNA was extracted from EDTA-venous blood samples using FlexiGene DNA Kit (QIAGEN GmbH, Hilden, Germany) and brain tumor tissues using QIAmp DNA Mini Kit (QIAGEN GmbH, Hilden, Germany) methodologies. Genotyping was conducted by the SNP&SEQ Technology Platform, Uppsala, Sweden ([www.genotyping.se](http://www.genotyping.se)) using Illumina HumanOmni1-Quad BeadChips according to the manufacturer's protocols.

### TCGA data

The validation dataset for this study was compiled from publically available TCGA data. Illumina idat-files from matched tumor and blood samples were downloaded (13 December 2011) for 334 GBM patients analyzed on the Illumina HumanHap550 array. Samples from 32 patients (all from the same sample plate) were excluded due to a large proportion of failed probes (>5%). Furthermore, we excluded two additional patients due to probable sample mix-ups (the blood raw data profiles appeared very similar to typical tumor samples). In total we found matched tumor and blood samples from 300 GBM patients eligible to use as a validation set.

### Data Pretreatment

Generated intensity data was imported into GenomeStudio software. The GenCall Score cutoff was set to 0.15. Log R ratio (LRR) and B allele frequency (BAF) data from each sample and probe was subsequently exported. To avoid downstream difficulties with segmentation, we removed LRR and BAF data from W-

probes with  $LRR < -2$  and replaced them with missing value. This was done individually for each sample in the UMU-dataset. The HumanHap550 array does not contain W-probes, hence this does not apply to the TCGA data. Lastly, we adjusted for GC-waves in both datasets [14].

### Allele-Specific Copy Number

We used the ASCAT-algorithm [15] (version 2.0) to calculate genome-wide allele-specific copy number individually for each sample (Fig. 1). ASCAT also estimates tumor cell content and tumor cell ploidy.

### Copy number analyses

Each individual probe was assigned to at least one of eight types of genomic events (Table 3). In order to account for aneuploidy due to whole-genome duplication by endoreduplication and make copy number comparisons over samples with different ploidy more biologically relevant, we first assigned samples either a diploid-like or tetraploid-like subclass, and divided the copy numbers by two for tetraploid-like samples. To classify samples as tetraploid- or diploid-like, we used the ASCAT sample ploidy estimation and set the cutoff to 2.8, as samples with a sample ploidy above this threshold seem to have undergone whole-genome duplication, contrary to samples with lower sample ploidy (Fig. 2).

In the discovery phase, performed on UMU-data, we used two complementary approaches to study correlation between risk variants and the specified genomic events; one global and one focused on selected genes of interest. The global approach was designed to explore correlations anywhere in the genome, with the prerequisite that the event frequency was relatively large. The genes-of-interest approach was designed to explore a set of predefined genes, regardless of event frequency. All steps of the analyses were performed in R ([www.R-project.org](http://www.R-project.org)).

### Global approach

For each individual probe, we calculated the frequency of a given event in all samples. We then calculated an event frequency cutoff, to locate recurring events in our sample series. The event frequency cutoff was calculated based on permutations of genomic positions. After the genomic positions had been permuted, individually for each sample, the event frequency at each probe was determined. Based on the generated random frequency data, an intermediate event frequency cutoff was set using a false positive rate of 0.5% (which we estimate correspond to a true discovery rate of 90 to 99%). The permutation of genomic positions was repeated a total of 100 times, and we used the mean value of the intermediate event frequency cutoffs as our final cutoff to call recurrent events. X-chromosome data was left out of the permutation procedure.

We split the dataset into two groups based on a given risk variant (Table 1); samples homozygous for the major allele constituted one group and samples homozygous for the rare allele plus heterozygous samples constituted the other group. In case the risk variant we aimed to investigate was not present on the SNP array, we used a surrogate marker that was in linkage disequilibrium with the original risk variant (Table 1). The surrogate marker was selected from available SNPs as the one with the largest  $r^2$ -value, based on HapMap data. We then tested the hypothesis that the group containing the risk allele displayed a higher event frequency than the other group, by applying one sided Fisher's Exact tests to the frequency data of each probe. This was performed only on probes within regions where the risk group displayed event frequencies above the event frequency cutoff.

**Table 2.** UMU sample set characteristics.

|                                   | All samples | Solved by ASCAT |
|-----------------------------------|-------------|-----------------|
| Total number of patients          | 95          | 81              |
| Gender (male/female)              | 59/36       | 52/29           |
| Age at dianosis median (yrs)      | 56 (15–80)  | 55 (15–80)      |
| Male                              | 57          | 57              |
| Female                            | 54          | 53              |
| Histological subtype distribution |             |                 |
| GBM                               | 63          | 55              |
| Non GBM                           | 32          | 26              |

doi:10.1371/journal.pone.0047929.t002

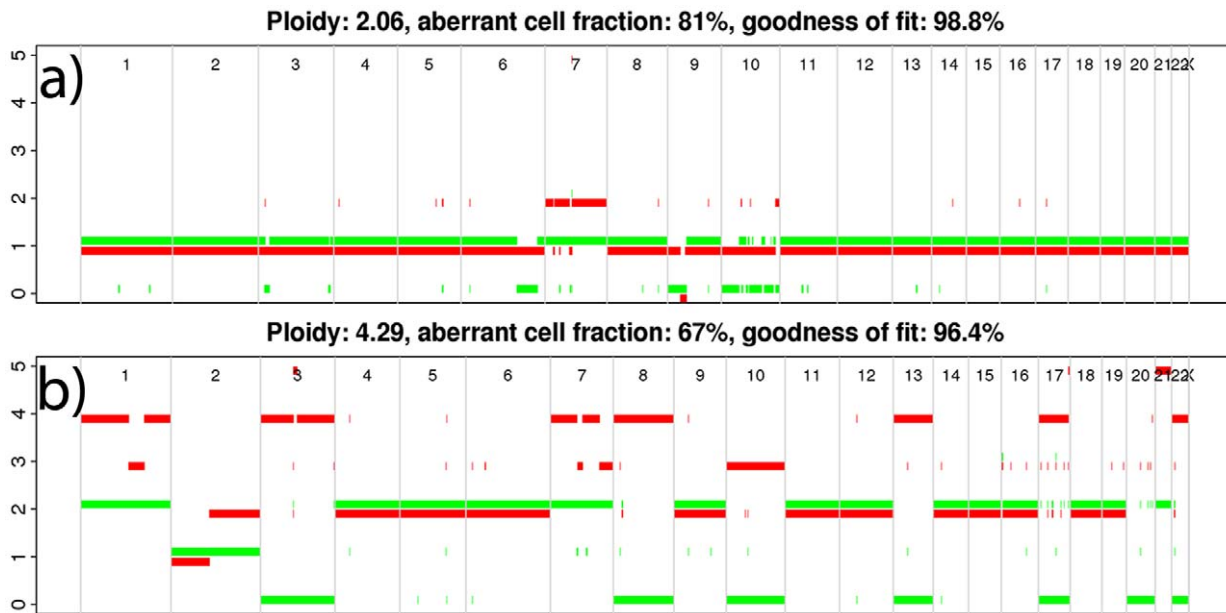

**Figure 1. ASCAT-profiles.** Whole genome ASCAT-profiles from two samples in the UMU dataset; one diploid (a) and one tetraploid (b). Green represents the allele with the lower copy number, and red represents the allele with the higher copy number (the colors are slightly offsetted to avoid overlap, red downwards and green upwards).  
doi:10.1371/journal.pone.0047929.g001

Genomic regions with  $p$ -value < cutoff (defined below) in the UMU dataset were shortlisted for validation in the TCGA dataset.

The  $p$ -value cutoff was determined through permutation. In each permutation, we randomly assigned all samples to one of the two groups (while maintaining constant group sizes), and thereafter calculated  $p$ -values across the genome, as described above. The permutation was repeated 100 times, and for each run the lowest recorded  $p$ -value was stored. The  $p$ -value cutoff was set to the 95<sup>th</sup> percentile of the stored  $p$ -values from the permutation procedure. This procedure is similar to that described in Lystig et al [16].

This approach was repeated for each event of interest, as well as for all risk variants.

#### Genes-of-interest approach

The genes of interest (Table 4) were selected from the pathways identified in the TCGA report [6], and supplemented with a few genes of documented biological relevance to glioma tumorigenesis.

For each gene of interest, each sample was classified as positive or negative for a given event. Samples were classified as positive if >50% of the probes within the locus of the gene were positive, and vice versa. We divided the samples into two groups, based on the

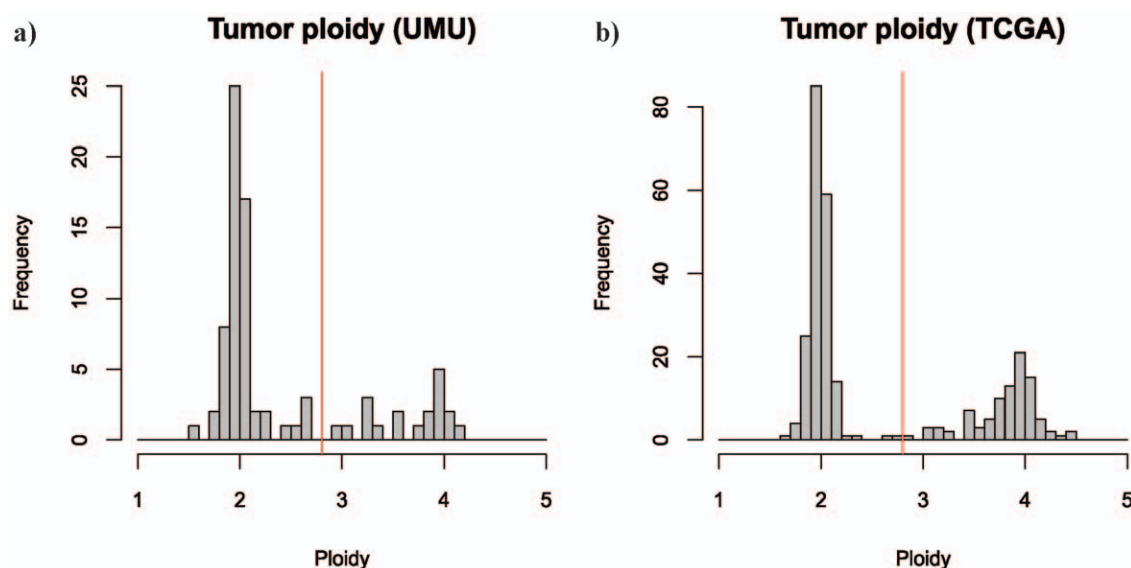

**Figure 2. Tumor ploidy.** ASCAT calculated tumor ploidy for 81 UMU samples (a) and 285 TCGA samples (b). Samples with ploidy >2.8 were classified as tetraploid-like and samples with ploidy ≤ 2.8 as diploid-like.  
doi:10.1371/journal.pone.0047929.g002

**Table 3.** Description of genomic events.

| Genomic events                             | Definition <sup>a</sup>                    |
|--------------------------------------------|--------------------------------------------|
| Normal                                     | $nA = 1$ AND $nB = 1$                      |
| Loss                                       | $nTot < 2$                                 |
| Increased copy number                      | $nTot > 2$                                 |
| Loss of heterozygosity (LOH)               | $nA = 0$ OR $nB = 0$                       |
| Copy number neutral events (CNNE)          | $nA \neq 1$ AND $nB \neq 1$ AND $nTot = 2$ |
| Homozygous deletion (HD)                   | $nTot = 0$                                 |
| Amplification                              | $nTot \geq 8$                              |
| Simultaneous LOH and increased copy number | $(nA = 0$ OR $nB = 0)$ AND $nTot > 2$      |

<sup>a</sup> $nTot = nA + nB$ , where  $nA$  and  $nB$  represent calculated copy numbers for the separate alleles at a given probe.

doi:10.1371/journal.pone.0047929.t003

same principle used in the global approach. Subsequently we applied a one sided Fisher's Exact test to the contingency table of samples with and without event, to test the hypothesis that the group containing the risk allele displayed a higher event frequency than the other group. Gene/event combinations with  $p < 0.05$  in the UMU dataset were shortlisted for validation in the TCGA data set.

**Table 4.** Genes of interest.

| Gene   | Locus                     |
|--------|---------------------------|
| CDKN2C | chr1:51206954-51212894    |
| MDM4   | chr1:202752129-202793871  |
| AKT3   | chr1:241729643-242073207  |
| IDH1   | chr2:208809197-208828051  |
| PIK3CA | chr3:180349004-180435191  |
| PDGFRA | chr4:54790020-54859169    |
| TERT   | chr5:1306286-1348162      |
| PIK3R1 | chr5:67547339-67633405    |
| PARK2  | chr6:161688579-163068824  |
| EGFR   | chr7:55054218-55242525    |
| CDK6   | chr7:92072170-92301167    |
| MET    | chr7:116099694-116225676  |
| MYC    | chr8:128817496-128822862  |
| CCDC26 | chr8:130433119-130761667  |
| CDKN2A | chr9:21957750-21965132    |
| CDKN2B | chr9:21992901-21999312    |
| PTEN   | chr10:89613174-89718512   |
| PHLDB1 | chr11:117982422-118033958 |
| CCND2  | chr12:4253162-4284783     |
| CDK4   | chr12:56427776-56432497   |
| MDM2   | chr12:67488237-67525479   |
| RB1    | chr13:47775883-47954027   |
| IDH2   | chr15:88428215-88446712   |
| TP53   | chr17:7512444-7531593     |
| NF1    | chr17:26446070-26728821   |
| ERBB2  | chr17:35109779-35138441   |
| RTEL1  | chr20:61759606-61798050   |

doi:10.1371/journal.pone.0047929.t004

## Validation

All events found in the discovery phase were subsequently validated in the TCGA dataset. We used the same method as for the genes-of-interest approach. I.e., for each combination of event and region/gene of interest that was selected for validation, we classified all TCGA samples as either positive or negative for the given event within the region/gene of interest. To be classified as positive,  $>50\%$  of all probes within the region/gene of interest had to be positive. We thereafter split the dataset in two and performed a one-sided Fisher's Exact test, as previously described.

## Results

We inferred copy number profiles of glioma tumor cells from SNP array data, accounting for non-aberrant cell admixture and tumor aneuploidy, using the ASCAT algorithm [15]. We obtained ASCAT profiles (i.e. whole-genome allele-specific copy number profiles) (Fig. 1) for 81 of 95 samples (85%) in the UMU discovery dataset, and for 285 of 300 samples (95%) in the TCGA validation dataset. Distributions of sample ploidy were similar for both datasets and indicated that 23% and 33% of the samples had undergone whole-genome duplication in the UMU and TCGA datasets respectively (Fig. 2).

We calculated the frequency of the defined somatic events over the whole genome in the UMU dataset, and determined regions where each event was significantly recurring (Fig. 3). Within these regions, we tested the hypothesis that samples that carry the germline risk genotype for a given risk variant also display a greater frequency of somatic aberrations. In the discovery phase, we found 59 region/event combinations that were significantly more frequent in the risk group (Table S1). In many cases the same type of event, correlated to the same risk genotype, occurred on genomic regions adjacent to each other, and were only separated due to frequency drops caused by genomic breakpoints in just a few patients. Nine of these events could not be tested in the validation phase, due to a lack of probe coverage in the given region (number of probes  $\leq 2$  on the HumanHap550 array). Two of the remaining events were found to be significant also in the validation set. They were both homozygous deletion events within the 9p21.3 region, correlated to the EGFR variant rs17172430 (Fig. 4; Table 5; Table S1).

By the complementary genes-of-interest approach, we found 35 events that were significantly more frequent in the risk group in the discovery phase. Four of these proved significant also in the validation phase (Table S2). One was LOH in the EGFR gene, associated with a risk variant in the EGFR gene (rs17172430).

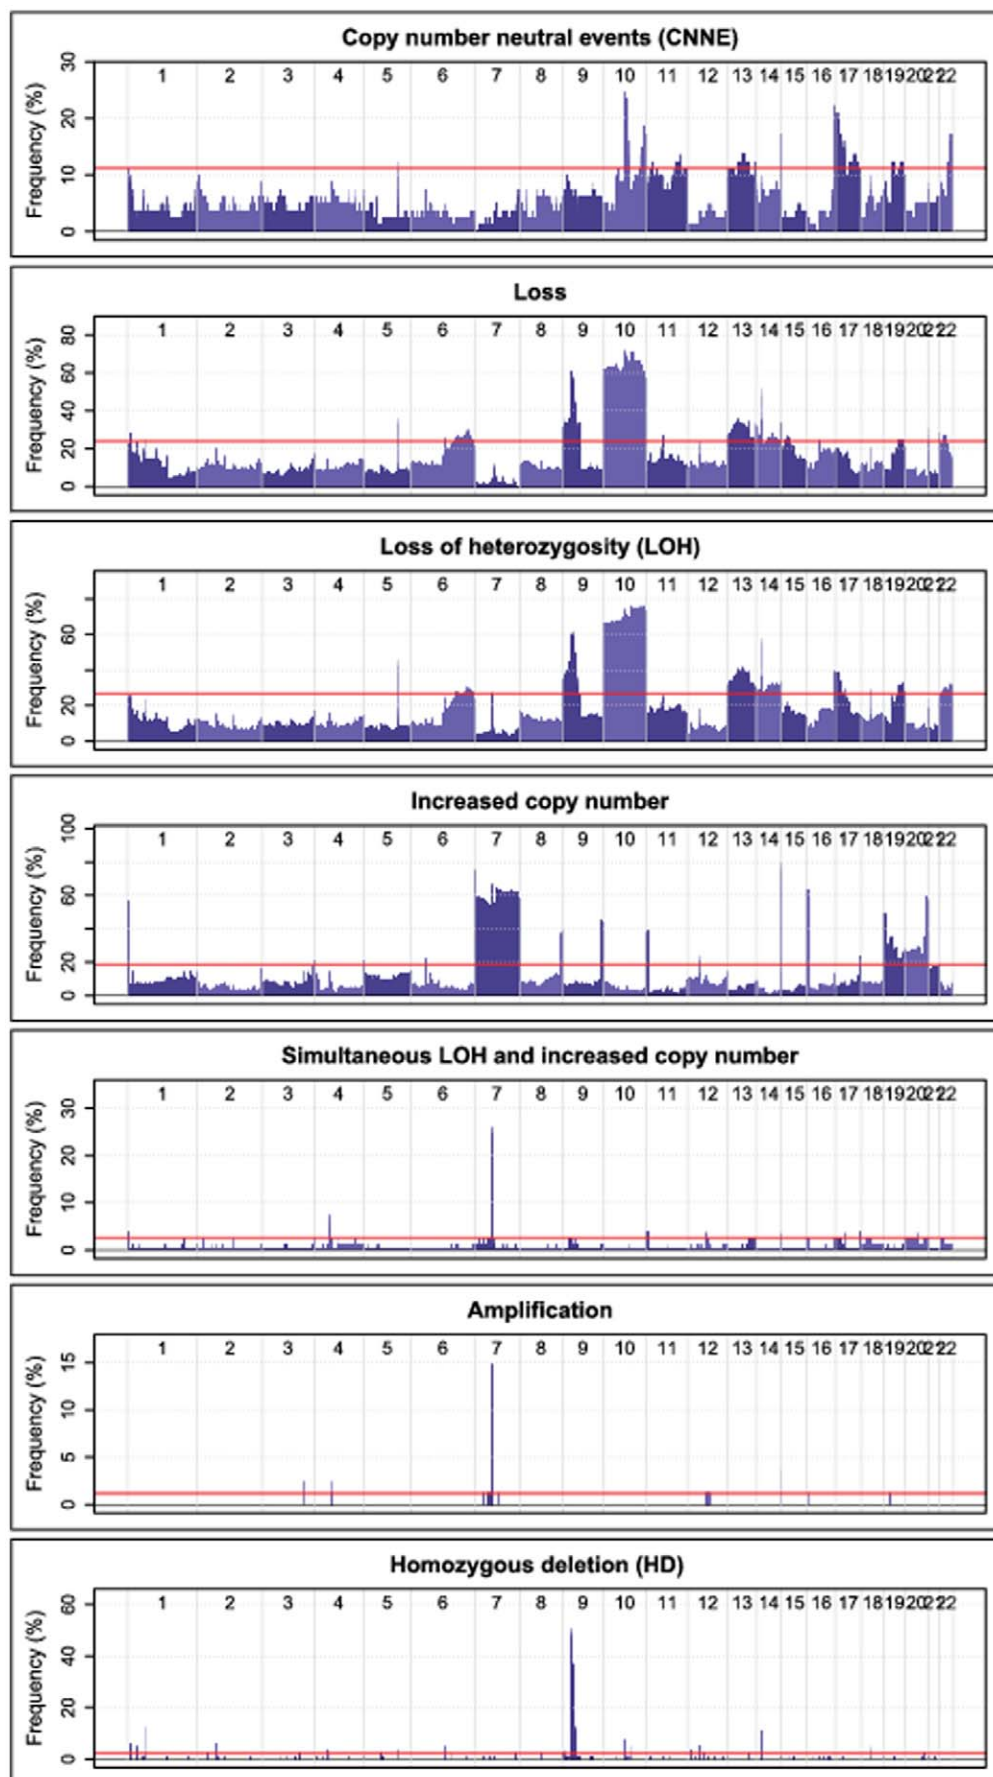

**Figure 3. Frequency of genomic events among UMU samples.** Frequency (%) is represented on the y-axis and genomic position on the x-axis. The permutation derived event frequency cutoff (used to establish regions with significantly recurring events among the UMU samples) is illustrated by the red line.  
doi:10.1371/journal.pone.0047929.g003

Three were homozygous deletion events in the CDKN2A/B genes, associated with two different risk variants in the EGFR gene (rs17172430 and rs11979158).

Among the UMU samples, 60 samples were homozygous for the risk allele at the EGFR variant rs1015793 (which was used as a surrogate for the risk variant rs17172430). Of these, 19 displayed LOH at the EGFR locus, and 35 displayed HD at the CDKN2A locus. Fourteen of the 60 displayed both HD at CDKN2A/B and LOH at the EGFR locus (Fig. 5).

The results are summarized in Table 5.

## Discussion

Molecular profiling of glioma has identified several important pathways that characterize the different histopathological types of glioma. Increased insight into glioma biology is important to help understand its etiology and initiation processes, which in turn may enable development of preventive and therapeutic strategies. In the present study, we have identified correlations between germline EGFR gene variants (rs17172430 and rs11979158) and loss of heterozygosity (LOH) at the EGFR locus as well as homozygous deletion at the CDKN2A/B locus. This is indicative of a functional effect of a germline variant on tumor progression. Discoveries in genetic etiology have been important for the development of novel treatments in other cancers, such as PARP-2 inhibitors in breast cancer patients carrying mutations in the BRCA1 gene [17].

Early studies showed two major pathways of glioma progression, characterized by EGFR amplification [18] and TP53 alterations [19], respectively. The two pathways were anticipated to be mutually exclusive. More recently, additional genetic signatures have been discovered, such as co-deletion of chromosomal arms 1p and 19q in oligodendroglioma [20] and IDH1 mutations, where the latter is typical among low grade tumors [21]. The cancer genome atlas research network (TCGA) has successfully

characterized 206 glioblastoma cases by comprehensive analysis of DNA copy number, gene expression and DNA methylation aberrations [6]. They identified three major pathways that are central to glioma progression. As EGFR and CDKN2A/B each is an early actor in at least one of these three pathways, the results of our study relate to all three of the TCGA presented pathways.

We have investigated 13 germline gene variants, annotating 8 genes associated with glioma susceptibility (Table 1). Variants of the CCDC26 and PHLDB1 genes have predominantly been associated with low grade glioma, and there is a clear correlation between these variants and IDH1 mutation status [1]. Variants of the TERT and RTEL genes are predominantly associated with glioblastoma [12,13], whereas variants of the CDKN2A and EGFR genes are associated with overall glioma risk, not with a specific subtype. The UMU dataset used in the discovery phase in our study included various histological subtypes of glioma – hence genetic aberrations found associated with germline variants in this dataset are likely to be aberrations common between glioma subtypes. Aberrations common between glioma subtypes are most likely early events, and therefore of general importance to glioma etiology.

In this study, we investigated two variants annotating the CDKN2A/B genes (rs1412829 and rs4977756). We found no significant associations between these variants and somatic copy number alterations anywhere in the genome. This is similar to the findings of another recent study, where the same variants were investigated in relation to copy number alterations of the CDKN2A/B genes, and no associations were found [22].

We report a correlation between a risk variant in EGFR intron 1 (rs17172430) and LOH at the EGFR locus. This is in contrast to the report by Sanson et al [1], in which they found no significant correlation between EGFR risk variants and EGFR amplification, determined by fluorescence in situ hybridization (FISH). The discrepancy between these findings may in part be explained by the different methods used. Our approach allowed for investiga-

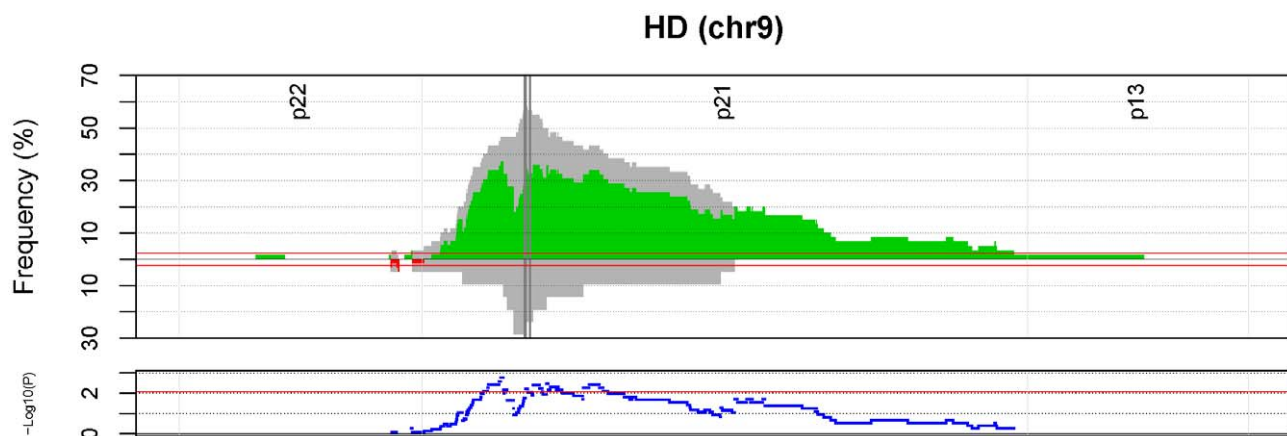

**Figure 4. Frequency of homozygous deletion at chr9.p21, among UMU samples.** The samples are split into two groups, based on their genotype at the EGFR variant rs1015793. HD frequency among samples homozygous for the major allele is plotted on the upper half of the upper panel (grey bars), and the HD frequency among samples homozygous for the rare allele plus heterozygous samples is plotted on the lower half of the upper panel (green bars). The frequency difference between the groups is illustrated with overlaying red and green bars. The event frequency cutoff is illustrated by the horizontal red lines. The dark grey, vertical lines represent CDKN2A and CDKN2B. The lower panel illustrates the p-values ( $-\log_{10}$  transformed) at each genomic site, with the horizontal red line illustrating the permutation derived p-value cutoff (0.0085).  
doi:10.1371/journal.pone.0047929.g004

**Table 5.** Significant correlations between germline gene variants and somatic aberrations.

| UMU          |                        |          |              |       |            |                        |                              |                                    |                                | TCGA   |            |           |                 |             |                   |        |          |
|--------------|------------------------|----------|--------------|-------|------------|------------------------|------------------------------|------------------------------------|--------------------------------|--------|------------|-----------|-----------------|-------------|-------------------|--------|----------|
| Risk variant | Region                 | Cytoband | Gene         | Event | Variant    | n (major) <sup>a</sup> | n (major) event <sup>a</sup> | n (rare+hz) (rare+hz) <sup>a</sup> | n (rare+hz) event <sup>a</sup> | P      | Variant    | n (major) | n (major) event | n (rare+hz) | n (rare+hz) event | P      | Approach |
| rs17172430   | chr7:55054218-55242525 | 7p11.2   | EGFR         | LOH   | rs1015793  | 60 (41/19)             | 19 (15/4)                    | 21 (14/7)                          | 2 (2/0)                        | 0.0385 | rs17172430 | 236       | 57              | 49          | 6                 | 0.0455 | GOI      |
| rs11979158   | chr9:21957750-21965132 | 9p21.3   | CDKN2A       | HD    | rs10245472 | 57 (39/18)             | 33 (26/7)                    | 24 (16/8)                          | 8 (7/1)                        | 0.0374 | rs11979158 | 209       | 51              | 76          | 10                | 0.0267 | GOI      |
| rs11979158   | chr9:21992901-21999312 | 9p21.3   | CDKN2B       | HD    | rs10245472 | 57 (39/18)             | 32 (25/7)                    | 24 (16/8)                          | 7 (6/1)                        | 0.0233 | rs11979158 | 209       | 122             | 76          | 32                | 0.0107 | GOI      |
| rs17172430   | chr9:21992901-21999312 | 9p21.3   | CDKN2B       | HD    | rs1015793  | 60 (41/19)             | 34 (27/7)                    | 21 (14/7)                          | 5 (4/1)                        | 0.0088 | rs17172430 | 236       | 134             | 49          | 20                | 0.0300 | GOI      |
| rs17172430   | chr9:21961989-21978896 | 9p21.3   | MTAP, CDKN2A | HD    | rs1015793  | 60 (41/19)             | 35 (28/7)                    | 21 (14/7)                          | 5 (4/1)                        | 0.0062 | rs17172430 | 236       | 135             | 49          | 20                | 0.0264 | global   |
| rs17172430   | chr9:22010493-22055620 | 9p21.3   | MTAP, CDKN2B | HD    | rs1015793  | 60 (41/19)             | 33 (27/6)                    | 21 (14/7)                          | 4 (3/1)                        | 0.0040 | rs17172430 | 236       | 132             | 49          | 19                | 0.0210 | global   |

*n* number, *major* samples homozygous for the major allele, *rare+hz* samples homozygous for the rare allele plus heterozygous samples, *event* samples positive for given event, *GOI* genes of interest.

<sup>a</sup>total number of samples (glioblastoma samples/non-glioblastoma samples).

doi:10.1371/journal.pone.0047929.t005

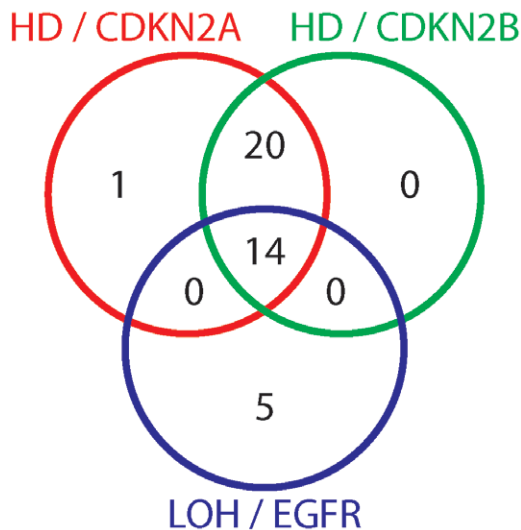

**Figure 5. Overlap of genomic events among patients harboring risk allele at rs1015793.** Venn diagram of patients that were homozygous for the risk allele at rs1015793, and displayed aberrations at EGFR and CDKN2A/B.  
doi:10.1371/journal.pone.0047929.g005

tion of allele-specific loss and gain, whereas FISH is not designed to detect allele-specific events (such as copy number neutral LOH). Moreover, the two studies have investigated overlapping but different sets of gene variants. The variants are all in disequilibrium with each other, to a certain degree (Fig. 6), but it is not surprising that one variant correlates to a specific genomic event whereas the others do not.

Figure 3 reveals almost identical frequencies of the two events LOH and ‘simultaneous LOH and increased copy number’ at the EGFR locus (frequency peaks close to the middle of chromosome 7); 26% and 25% respectively. With this in mind, and considering that the EGFR risk variant rs17172430 is associated with an increased frequency of LOH at the EGFR locus, one would expect it to be associated also with an increased frequency of ‘simultaneous LOH and increased copy number’ at the same locus. The fact is, we observe a border line significant association ( $P = 0.051$ ) between the two. The discrepancy between the frequencies of LOH and ‘simultaneous LOH and increased copy number’ at the EGFR locus in the UMU dataset is made up by only one patient, who is classified as positive for LOH but negative for ‘simultaneous LOH and increased copy number’ at the EGFR locus.

EGFR is a large gene (188 kb) with a complex haplotype structure. Intron 1 alone, harboring both rs17172430 and rs11979158, consists of >122 000 bases. Our findings imply that variation in this region has a functional role. However, this needs to be investigated further, for example by targeted re-sequencing of the region, to explore the possibility of germline functional mutations in linkage disequilibrium with the identified risk genotype.

The other main findings of our study were correlations between the EGFR risk genotypes (rs17172430 and rs11979158) and homozygous deletions of CDKN2A/B. Genetic events in CDKN2A/B and EGFR often co-occur, thus it is difficult to disentangle whether these are independent events, or whether the CDKN2A/B events are secondary to the EGFR event. Table 5 lists three separate associations between rs17172430 and HD at 9p21 (i.e. the CDKN2A/B locus); these should not be considered independent. The separate listings reflect both that two different

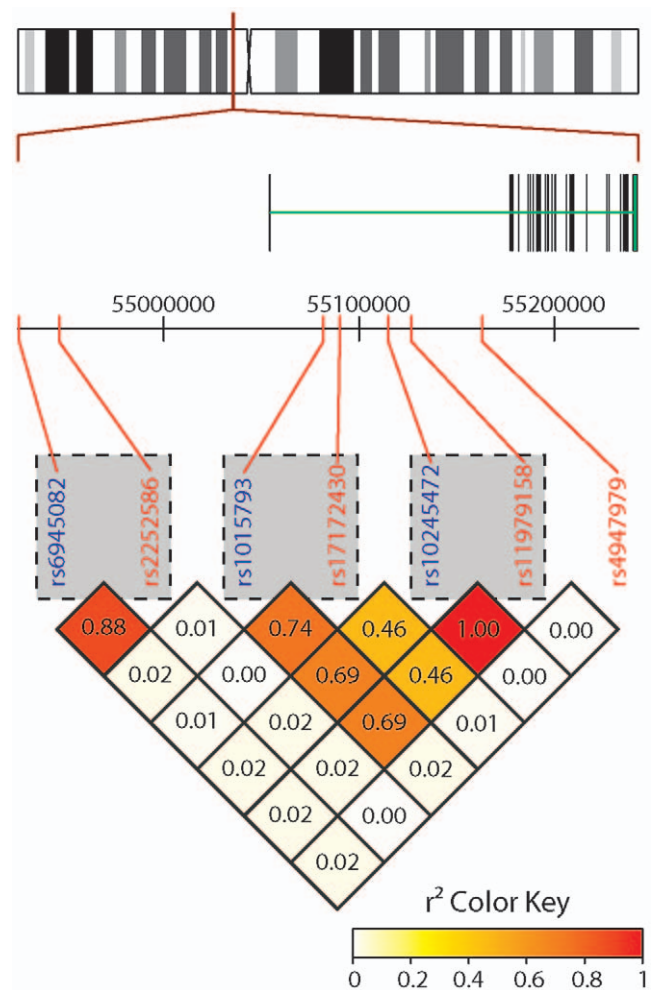

**Figure 6. EGFR gene structure.** Schematic diagram of the EGFR gene structure, marking all gene variants included in the study and their internal LD structure. Pairs of risk variants (red) and surrogate markers used in the UMU data (blue) are marked with dashed rectangles.  
doi:10.1371/journal.pone.0047929.g006

approaches were used to analyze the data, and the fact that the global approach often picked up adjacent regions that were separated due to frequency drops caused by genomic breakpoints in just a few patients (Table S1). Figure 4 provides a clear illustration of the association between rs1015793 (used as a surrogate for rs17172430 in UMU data) and HD at 9p21 locus.

Several associations from the discovery phase were not significant in the validation set. The UMU sample set (used for discovery) contained all different subsets of glioma, whereas the TCGA sample set (used for validation) contained only glioblastoma. Because of this, the validation procedure would have discarded any associations between germline gene variants and somatic copy number aberrations that were mainly evident among other lower graded glioma. However, as there appears to be no such events found in the discovery phase (Table S1 and S2), we do not believe this is an issue in this case.

Estimating genome-wide copy numbers from SNP-chip genotype data from tumor samples is complicated by the facts that tumor cells may not be diploid and that samples many times contain DNA from both tumor and stromal cells. The ASCAT algorithm solves both these inherent difficulties and allows for genome-wide allele-specific analysis of copy number from tumor

samples [15]. As LOH events are important in cancer development, allele-specific copy number data can be very important. In this study, we used two approaches to explore correlations between germline gene variants and somatic aberrations; one global and one focused on selected genes of interest. The global approach was exploring the possibility that the germline gene variants could be associated to somatic events anywhere in the genome. This approach did not provide evidence for a higher frequency of somatic aberrations in patients with a specific germline variant. However, this analysis has clear power limitations and was thus complemented by a focused genes-of-interest analysis.

In conclusion, we have found correlations between EGFR gene variants and somatic aberrations of both EGFR and CDKN2A/B. We believe these variants may have a driving effect on glioma progression, and thus provide a novel lead to further understanding of genotype-phenotype correlations in glioma etiology. Additional studies of the direct functional role need to be conducted to elucidate the molecular mechanisms underlying the identified association between germline gene variants and somatic aberrations.

## References

1. Sanson M, Hosking FJ, Shete S, Zelenika D, Dobbins SE, et al. (2011) Chromosome 7p11.2 (EGFR) variation influences glioma risk. *Hum Mol Genet* 20: 2897–2904.
2. Shete S, Hosking FJ, Robertson LB, Dobbins SE, Sanson M, et al. (2009) Genome-wide association study identifies five susceptibility loci for glioma. *Nat Genet* 41: 899–904.
3. Wrensch M, Jenkins RB, Chang JS, Yeh RF, Xiao Y, et al. (2009) Variants in the CDKN2B and RTEL1 regions are associated with high-grade glioma susceptibility. *Nat Genet* 41: 905–908.
4. Andersson U, Schwartzbaum J, Wiklund F, Sjöström S, Liu Y, et al. (2010) A comprehensive study of the association between the EGFR and ERBB2 genes and glioma risk. *Acta Oncol* 49: 767–775.
5. Schwartzbaum JA, Xiao Y, Liu Y, Tsavachidis S, Berger MS, et al. (2010) Inherited variation in immune genes and pathways and glioblastoma risk. *Carcinogenesis* 31: 1770–1777.
6. TCGA TCGATRN (2008) Comprehensive genomic characterization defines human glioblastoma genes and core pathways. *Nature* 455: 1061–1068.
7. Melin B (2011) Genetic causes of glioma: new leads in the labyrinth. *Curr Opin Oncol* 23: 643–647.
8. Barber LJ, Youds JL, Ward JD, McIlwraith MJ, O'Neil NJ, et al. (2008) RTEL1 maintains genomic stability by suppressing homologous recombination. *Cell* 135: 261–271.
9. Sharma GG, Gupta A, Wang H, Scherthan H, Dhar S, et al. (2003) hTERT associates with human telomeres and enhances genomic stability and DNA repair. *Oncogene* 22: 131–146.
10. Saavedra HI, Fukasawa K, Conn CW, Stambrook PJ (1999) MAPK mediates RAS-induced chromosome instability. *J Biol Chem* 274: 38083–38090.
11. Cymer F, Schneider D (2010) Transmembrane helix-helix interactions involved in ErbB receptor signaling. *Cell Adh Migr* 4: 299–312.
12. Jenkins RB, Wrensch MR, Johnson D, Fridley BL, Decker PA, et al. (2011) Distinct germ line polymorphisms underlie glioma morphologic heterogeneity. *Cancer Genet* 204: 13–18.
13. Simon M, Hosking FJ, Marie Y, Gousias K, Boisselier B, et al. (2010) Genetic risk profiles identify different molecular etiologies for glioma. *Clin Cancer Res* 16: 5252–5259.
14. Diskin SJ, Li M, Hou C, Yang S, Glessner J, et al. (2008) Adjustment of genomic waves in signal intensities from whole-genome SNP genotyping platforms. *Nucleic Acids Res* 36: e126.
15. Van Loo P, Nordgard SH, Lingjaerde OC, Russnes HG, Rye IH, et al. (2010) Allele-specific copy number analysis of tumors. *Proc Natl Acad Sci U S A* 107: 16910–16915.
16. Lystig TC (2003) Adjusted P values for genome-wide scans. *Genetics* 164: 1683–1687.
17. Audeh MW, Carmichael J, Penson RT, Friedlander M, Powell B, et al. (2010) Oral poly(ADP-ribose) polymerase inhibitor olaparib in patients with BRCA1 or BRCA2 mutations and recurrent ovarian cancer: a proof-of-concept trial. *Lancet* 376: 245–251.
18. Ekstrand AJ, Longo N, Hamid ML, Olson JJ, Liu L, et al. (1994) Functional characterization of an EGF receptor with a truncated extracellular domain expressed in glioblastomas with EGFR gene amplification. *Oncogene* 9: 2313–2320.
19. Watanabe K, Tachibana O, Sata K, Yonekawa Y, Kleihues P, et al. (1996) Overexpression of the EGF receptor and p53 mutations are mutually exclusive in the evolution of primary and secondary glioblastomas. *Brain Pathol* 6: 217–223; discussion 223–214.
20. Barbashina V, Salazar P, Holland EC, Rosenblum MK, Ladanyi M (2005) Allelic losses at 1p36 and 19q13 in gliomas: correlation with histologic classification, definition of a 150-kb minimal deleted region on 1p36, and evaluation of CAMTA1 as a candidate tumor suppressor gene. *Clin Cancer Res* 11: 1119–1128.
21. Yan H, Parsons DW, Jin G, McLendon R, Rasheed BA, et al. (2009) IDH1 and IDH2 mutations in gliomas. *N Engl J Med* 360: 765–773.
22. Feng J, Kim ST, Liu W, Kim JW, Zhang Z, et al. (2012) An integrated analysis of germline and somatic, genetic and epigenetic alterations at 9p21.3 in glioblastoma. *Cancer* 118: 232–240.

## Supporting Information

**Table S1 Validation results, global approach.** Results from validation of all regions that were selected for validation by the global approach. (XLSX)

**Table S2 Validation results, genes-of-interest approach.** Results from validation of all genes that were selected for validation by the genes-of-interest approach. (XLSX)

## Acknowledgments

The results published here are in part based upon data generated by The Cancer Genome Atlas established by the NCI and NHGRI. Information about TCGA and the investigators and institutions who constitute the TCGA research network can be found at “<http://cancergenome.nih.gov>”.

## Author Contributions

Conceived and designed the experiments: CW UA BM CL. Analyzed the data: CW PVL JT PR. Contributed reagents/materials/analysis tools: SG TB RH TB UA. Wrote the paper: CW PR BM. Critical revision: SG PVL TB JT RH TB UA PR BM CL.
