# Supplementary material for: EGFR Gene Variants Are Associated with Specific Somatic Aberrations in Glioma
Source: PLoS One. 2012 Dec 7;7(12):e47929. doi: 10.1371/journal.pone.0047929 (PMC3517607; doi:10.1371/journal.pone.0047929)
Supplement: Table S2 — Validation results, genes-of-interest approach. Results from validation of all genes that were selected for validation by the genes-of-interest approach. (XLSX) [file pone.0047929.s002.xlsx]

## Sheet: Table S2
Table S2 Validation results, genes-of-interest approach
			UMU						TCGA
Locus	Gene	Event c	Variant	n (major) b	n (major) event b	n(rare+hz) b	n(rare+hz) event b	P	Variant	n (major)	n (major) event	n(rare+hz)	n(rare+hz) event	P	Validation region a	Sign.
chr1:51206954-51212894	CDKN2C	CN>2	rs4947979	44 (31/13)	5 (4/1)	37 (24/13)	0 (0/0)	0.0423864	rs4947979	184	18	101	5	0.111932	chr1p33
chr1:51206954-51212894	CDKN2C	LOH	rs903502	33 (20/13)	2 (1/1)	48 (35/13)	11 (6/5)	0.0384201	rs12150298	122	5	163	5	0.787038	chr1p33
chr1:51206954-51212894	CDKN2C	LOSS	rs903502	33 (20/13)	3 (2/1)	48 (35/13)	13 (8/5)	0.0400551	rs12150298	122	5	163	6	0.691329	chr1p33
chr1:202752129-202793871	MDM4	LOH	rs903502	33 (20/13)	0 (0/0)	48 (35/13)	6 (4/2)	0.037812	rs12150298	122	5	163	8	0.490395	MDM4
chr1:202752129-202793871	MDM4	LOH	rs9635726	44 (27/17)	0 (0/0)	37 (28/9)	6 (4/2)	0.00716332	rs9635726	186	9	99	4	0.720415	MDM4
chr1:241729643-242073207	AKT3	LOH	rs9635726	44 (27/17)	0 (0/0)	37 (28/9)	5 (3/2)	0.0170129	rs9635726	186	3	99	3	0.346664	AKT3
chr2:208809197-208828051	IDH1	LOSS	rs903502	33 (20/13)	0 (0/0)	48 (35/13)	8 (4/4)	0.0117319	rs12150298	122	6	163	9	0.521498	chr2q33.3
chr2:208809197-208828051	IDH1	LOSS	rs9635726	44 (27/17)	1 (0/1)	37 (28/9)	7 (4/3)	0.0152843	rs9635726	186	9	99	6	0.426297	chr2q33.3
chr3:180349004-180435191	PIK3CA	LOH	rs9635726	44 (27/17)	1 (1/0)	37 (28/9)	6 (4/2)	0.0323782	rs9635726	186	5	99	4	0.383516	PIK3CA
chr4:54790020-54859169	PDGFRA	LOH	rs903502	33 (20/13)	2 (2/0)	48 (35/13)	11 (7/4)	0.0384201	rs12150298	122	8	163	8	0.805216	PDGFRA
chr4:54790020-54859169	PDGFRA	CN>2	rs9635726	44 (27/17)	3 (2/1)	37 (28/9)	9 (6/3)	0.0285134	rs9635726	186	34	99	15	0.795992	PDGFRA
chr4:54790020-54859169	PDGFRA	LOH	rs9635726	44 (27/17)	3 (3/0)	37 (28/9)	10 (6/4)	0.0146708	rs9635726	186	11	99	5	0.709583	PDGFRA
chr7:55054218-55242525	EGFR	LOH	rs1015793	60 (41/19)	19 (15/4)	21 (14/7)	2 (2/0)	0.0385313	rs17172430	236	57	49	6	0.0455418	EGFR	*
chr7:55054218-55242525	EGFR	CN>2	rs634537	17 (8/9)	7 (3/4)	64 (47/17)	47 (37/10)	0.0147347	rs1412829	89	78	196	178	0.266646	EGFR
chr8:128817496-128822862	MYC	LOH	rs9635726	44 (27/17)	2 (2/0)	37 (28/9)	8 (6/2)	0.0225434	rs9635726	186	9	99	5	0.571987	chr8q24.21
chr8:128817496-128822862	MYC	LOSS	rs9635726	44 (27/17)	1 (1/0)	37 (28/9)	7 (5/2)	0.0152843	rs9635726	186	10	99	4	0.779786	chr8q24.21
chr8:130433119-130761667	CCDC26	LOH	rs9635726	44 (27/17)	2 (2/0)	37 (28/9)	7 (5/2)	0.0443205	rs9635726	186	9	99	5	0.571987	CCDC26
chr8:130433119-130761667	CCDC26	LOSS	rs9635726	44 (27/17)	1 (1/0)	37 (28/9)	6 (4/2)	0.0323782	rs9635726	186	10	99	5	0.644832	CCDC26
chr9:21957750-21965132	CDKN2A	HD	rs1015793	60 (41/19)	35 (28/7)	21 (14/7)	6 (5/1)	0.0174739	rs17172430	236	53	49	8	0.226672	chr9p21.3
chr9:21957750-21965132	CDKN2A	HD	rs10245472	57 (39/18)	33 (26/7)	24 (16/8)	8 (7/1)	0.037406	rs11979158	209	51	76	10	0.0267389	chr9p21.3	*
chr9:21992901-21999312	CDKN2B	HD	rs1015793	60 (41/19)	34 (27/7)	21 (14/7)	5 (4/1)	0.00882938	rs17172430	236	134	49	20	0.0299609	CDKN2B	*
chr9:21992901-21999312	CDKN2B	HD	rs10245472	57 (39/18)	32 (25/7)	24 (16/8)	7 (6/1)	0.0233171	rs11979158	209	122	76	32	0.010685	CDKN2B	*
chr10:89613174-89718512	PTEN	LOH	rs4977756	18 (10/8)	8 (6/2)	63 (45/18)	51 (40/11)	0.00373624	rs4977756	92	79	193	175	0.155168	PTEN
chr10:89613174-89718512	PTEN	LOSS	rs4977756	18 (10/8)	7 (5/2)	63 (45/18)	49 (40/9)	0.00268049	rs4977756	92	79	193	176	0.12354	PTEN
chr10:89613174-89718512	PTEN	LOH	rs634537	17 (8/9)	6 (4/2)	64 (47/17)	53 (42/11)	0.000274503	rs1412829	89	77	196	177	0.225021	PTEN
chr10:89613174-89718512	PTEN	LOSS	rs634537	17 (8/9)	6 (4/2)	64 (47/17)	50 (41/9)	0.00129724	rs1412829	89	76	196	179	0.0979437	PTEN
chr10:89613174-89718512	PTEN	CNNE	rs903502	33 (20/13)	0 (0/0)	48 (35/13)	6 (3/3)	0.037812	rs12150298	122	3	163	3	0.78212	PTEN
chr11:117982422-118033958	PHLDB1	LOH	rs903502	33 (20/13)	2 (2/0)	48 (35/13)	11 (8/3)	0.0384201	rs12150298	122	9	163	8	0.869065	PHLDB1
chr13:47775883-47954027	RB1	LOH	rs4977756	18 (10/8)	3 (2/1)	63 (45/18)	28 (19/9)	0.0278743	rs4977756	92	31	193	72	0.32361	RB1
chr13:47775883-47954027	RB1	LOH	rs634537	17 (8/9)	2 (1/1)	64 (47/17)	29 (20/9)	0.00941328	rs1412829	89	33	196	70	0.640239	RB1
chr15:88428215-88446712	IDH2	LOSS	rs903502	33 (20/13)	1 (1/0)	48 (35/13)	10 (6/4)	0.0196664	rs12150298	122	12	163	27	0.070633	IDH2
chr17:7512444-7531593	TP53	CNNE	rs6470745	43 (30/13)	4 (3/1)	38 (25/13)	12 (6/6)	0.0122157	rs4295627	198	28	87	9	0.858342	TP53
chr17:7512444-7531593	TP53	LOSS	rs903502	33 (20/13)	3 (2/1)	48 (35/13)	13 (9/4)	0.0400551	rs12150298	122	19	163	24	0.64431	TP53
chr17:35109779-35138441	ERBB2	LOSS	rs903502	33 (20/13)	2 (1/1)	48 (35/13)	11 (7/4)	0.0384201	rs12150298	122	16	163	15	0.892408	chr17q12
chr20:61759606-61798050	RTEL1	CN>2	rs634537	17 (8/9)	6 (3/3)	64 (47/17)	40 (32/8)	0.0415078	rs1412829	89	31	196	53	0.929218	RTEL1
n number, major samples homozygous for the major allele, rare+hz samples homozygous for the rare allele plus heterozygous samples, event samples positive for given event
a In case there was a lack of probe coverage for a gene in the TCGA data, the validation region was expanded to include the whole cytoband harboring the gene of interest.
b total number of samples (glioblastoma samples / non-glioblastoma samples)
c HD homozygous deletion, LOH loss of heterozygosity, CN>2 copy number increase, CNNE copy number neutral event
